# Supplementary material
Source: publisher site journal article supplement (https://bio-protocol.org/bio101/Review.aspx?action=FileDownLoad&fileUrl=%2fRAPeLIFE%2ffiles%2fdoc%2fu%2f2020051106%2fSupplemental+1.xlsx)
Supplement: Supplementary file 1 [file Review.aspx]

## Sheet: Strategy
# of fish lines	# of pools needed		Examples:
1	1		for 6 lines, need 3 pools:
3	2		Pool 1	Pool 2	Pool 3
6	3		1	4	6
10	4		4	2	5
15	5		5	6	3
21	6
28	7		for 10 lines, need 4 pools:
36	8		Pool 1	Pool 2	Pool 3	Pool 4
45	9		1	5	8	10
55	10		5	2	6	9
66	11		6	8	3	7
78	12		7	9	10	4
91	13
105	14		for 14 lines, need 5 pools:
120	15		Pool 1	Pool 2	Pool 3	Pool 4	Pool 5
136	16		1	6	10	13	-
153	17		6	2	7	11	14
171	18		7	10	3	8	12
			8	11	13	4	9
			9	12	14	-	5
			for 55 lines, need 10 pools:
			Pool 1	Pool 2	Pool 3	Pool 4	Pool 5	Pool 6	Pool 7	Pool 8	Pool 9	Pool 10
			1	11	12	13	14	15	16	17	18	19
			11	2	20	21	22	23	24	25	26	27
			12	20	3	28	29	30	31	32	33	34
			13	21	28	4	35	36	37	38	39	40
			14	22	29	35	5	41	42	43	44	45
			15	23	30	36	41	6	46	47	48	49
			16	24	31	37	42	46	7	50	51	52
			17	25	32	38	43	47	50	8	53	54
			18	26	33	39	44	48	51	53	9	55
			19	27	34	40	45	49	52	54	55	10
Strategy for identifying inserts in zebrafish genomes
How many pools are needed to detect an insert in a given number of fish lines?
Want each fish line to be in exactly 1 or 2 pools.
Want no pair of fish lines to be in more than 1 pool.
If prefered, can be done with 2 fish lines in every pool by adding one additional pool.

## Sheet: costs
# of fish lines	# of pools	library costs ($)	seq cost ($)	total cost ($)	cost per fish line ($)
1	1	50	825	875	875
3	2	100	825	925	308.333
6	3	150	825	975	162.5
10	4	200	825	1025	102.5
15	5	250	825	1075	71.6667
21	6	300	825	1125	53.5714
28	7	350	825	1175	41.9643
36	8	400	825	1225	34.0278
45	9	450	825	1275	28.3333
55	10	500	825	1325	24.0909
66	11	550	1650	2200	33.3333
78	12	600	1650	2250	28.8462
91	13	650	1650	2300	25.2747
105	14	700	1650	2350	22.381
120	15	750	1650	2400	20
136	16	800	1650	2450	18.0147
153	17	850	1650	2500	16.3399
171	18	900	1650	2550	14.9123
Does not include cost of pulldown probes
